# Supplementary material for: Progenitor cell combination normalizes retinal vascular development in the oxygen-induced retinopathy (OIR) model
Source: JCI journal article supplement (doi:10.1172/jci.insight.129224), 2019-10-31
Supplement: sd1 [file 1]

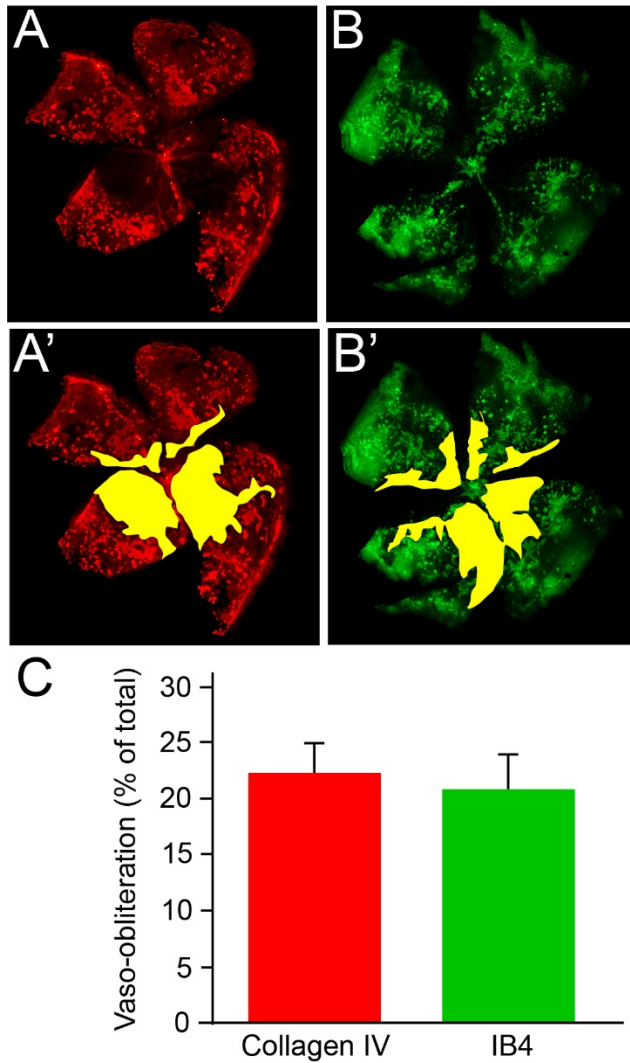

943 **Supplemental Figure 1: Comparison between Collagen IV and Isolectin B4 Staining for**  
 944 **the Detection of Vaso-obliteration.** **A:** Representative image of retinal flatmount stained with  
 945 Collagen IV (red). **A':** The retina in panel A with areas of vaso-obliteration highlighted (yellow).  
 946 **B:** Representative image of retinal flatmount stained with Isolectin B4 (green). **B':** The retina in  
 947 panel B with areas of vaso-obliteration highlighted (yellow). **C:** Summary of quantification of  
 948 vaso-obliteration areas. Values are expressed as percentage of total retina  $\pm$  SEM, n = 3 retinas  
 949 for each data set.

950

951

952

953

**Table S1. Genes differentially regulated in the OIR model as compared to normoxia.**

| Gene ID                                                       | Description                                                                                | Fold change | p value  |
|---------------------------------------------------------------|--------------------------------------------------------------------------------------------|-------------|----------|
| <b>Up-regulated</b>                                           |                                                                                            |             |          |
| <b>Angiogenesis, proliferation and endothelial physiology</b> |                                                                                            |             |          |
| Esm1                                                          | endothelial cell-specific molecule 1                                                       | 21.23       | 3.73E-08 |
| Igfbp3                                                        | insulin-like growth factor binding protein 3                                               | 5.76        | 1.10E-05 |
| Angpt2                                                        | angiopoietin 2                                                                             | 3.95        | 6.21E-06 |
| Vwf                                                           | Von Willebrand factor homolog                                                              | 3.86        | 2.94E-08 |
| Igfbp5                                                        | insulin-like growth factor binding protein 5                                               | 3.55        | 6.87E-05 |
| Ednra                                                         | endothelin receptor type A                                                                 | 3.18        | 1.93E-08 |
| Pecam1                                                        | platelet/endothelial cell adhesion molecule 1                                              | 2.76        | 6.58E-08 |
| Procr                                                         | protein C receptor, endothelial                                                            | 2.42        | 1.28E-05 |
| Vegfa                                                         | vascular endothelial growth factor A                                                       | 2.40        | 9.47E-07 |
| Vwa1                                                          | von Willebrand factor A domain containing 1                                                | 2.38        | 3.99E-04 |
| Angptl2                                                       | angiopoietin-like 2                                                                        | 2.24        | 2.34E-03 |
| Eng                                                           | endoglin                                                                                   | 1.91        | 5.43E-06 |
| Kit                                                           | kit oncogene                                                                               | 1.84        | 7.10E-05 |
| Ephb4                                                         | Eph receptor B4                                                                            | 1.77        | 3.27E-05 |
| Efna1                                                         | ephrin A1                                                                                  | 1.68        | 5.29E-06 |
| Ece1                                                          | endothelin converting enzyme 1                                                             | 1.51        | 6.43E-04 |
| <b>Inflammation</b>                                           |                                                                                            |             |          |
| Tgfb1                                                         | transforming growth factor, beta induced                                                   | 6.88        | 2.23E-09 |
| Egln3                                                         | egl-9 family hypoxia-inducible factor 3                                                    | 6.24        | 1.27E-04 |
| Cxcr4                                                         | chemokine (C-X-C motif) receptor 4                                                         | 2.97        | 2.25E-07 |
| Ctla2b                                                        | cytotoxic T lymphocyte-associated protein 2 beta                                           | 2.93        | 1.90E-05 |
| Ifitm3                                                        | interferon induced transmembrane protein 3                                                 | 2.79        | 2.97E-04 |
| Ctla2a                                                        | cytotoxic T lymphocyte-associated protein 2 alpha                                          | 2.34        | 9.42E-05 |
| Lyn                                                           | Yamaguchi sarcoma viral (v-yes-1) oncogene homolog                                         | 2.26        | 1.77E-04 |
| Tgfb1                                                         | transforming growth factor, beta 1                                                         | 2.13        | 7.63E-05 |
| Tgfb2                                                         | transforming growth factor, beta receptor II                                               | 2.02        | 1.23E-05 |
| Ets2                                                          | E26 avian leukemia oncogene 2, 3' domain                                                   | 1.94        | 3.60E-04 |
| Ets1                                                          | E26 avian leukemia oncogene 1, 5' domain                                                   | 1.88        | 2.29E-05 |
| Egln1                                                         | egl-9 family hypoxia-inducible factor 1                                                    | 1.86        | 4.68E-05 |
| Tgif1                                                         | TGFB-induced factor homeobox 1                                                             | 1.74        | 5.21E-05 |
| <b>ECM remodeling</b>                                         |                                                                                            |             |          |
| Col1a1                                                        | collagen, type I, alpha 1                                                                  | 4.63        | 2.22E-03 |
| Col4a1                                                        | collagen, type IV, alpha 1                                                                 | 4.21        | 2.84E-07 |
| Col3a1                                                        | collagen, type III, alpha 1                                                                | 3.54        | 3.79E-04 |
| Col4a2                                                        | collagen, type IV, alpha 2                                                                 | 3.54        | 9.82E-06 |
| Lama4                                                         | laminin, alpha 4                                                                           | 3.41        | 5.39E-08 |
| Fn1                                                           | fibronectin 1                                                                              | 3.30        | 2.84E-05 |
| Nid1                                                          | nidogen 1                                                                                  | 3.29        | 4.47E-04 |
| Nid2                                                          | nidogen 2                                                                                  | 3.02        | 2.19E-06 |
| Col5a2                                                        | collagen, type V, alpha 2                                                                  | 2.60        | 3.54E-05 |
| Col5a3                                                        | collagen, type V, alpha 3                                                                  | 2.39        | 7.29E-05 |
| Lamb1                                                         | laminin B1                                                                                 | 2.38        | 1.06E-04 |
| Lamc1                                                         | laminin, gamma 1                                                                           | 2.29        | 9.52E-08 |
| Col15a1                                                       | collagen, type XV, alpha 1                                                                 | 2.00        | 3.99E-04 |
| Col2a1                                                        | collagen, type II, alpha 1                                                                 | 1.89        | 5.24E-07 |
| <b>Cell-matrix interaction</b>                                |                                                                                            |             |          |
| Itga6                                                         | integrin alpha 6                                                                           | 2.39        | 1.23E-05 |
| Icam1                                                         | intercellular adhesion molecule 1                                                          | 2.09        | 3.77E-04 |
| Itga9                                                         | integrin alpha 9                                                                           | 1.98        | 5.74E-04 |
| Itgb1                                                         | integrin beta 1 (fibronectin receptor beta)                                                | 1.98        | 1.80E-05 |
| Icam2                                                         | intercellular adhesion molecule 2                                                          | 1.70        | 1.01E-04 |
| <b>Down-regulated</b>                                         |                                                                                            |             |          |
| <b>Neuronal and retina-specific pathways</b>                  |                                                                                            |             |          |
| Trhr                                                          | thyrotropin releasing hormone receptor                                                     | -2.66       | 7.90E-05 |
| Tacr3                                                         | tachykinin receptor 3                                                                      | -2.17       | 1.22E-03 |
| Grik1                                                         | glutamate receptor, ionotropic, kainate 1                                                  | -1.78       | 8.13E-04 |
| Arr3                                                          | arrestin 3, retinal                                                                        | -1.74       | 1.10E-04 |
| Nova1                                                         | neuro-oncological ventral antigen 1                                                        | -1.62       | 4.20E-04 |
| Syt2                                                          | synaptotagmin II                                                                           | -1.59       | 9.79E-04 |
| Cadps                                                         | Ca <sup>2+</sup> -dependent secretion activator                                            | -1.59       | 2.11E-03 |
| <b>Transporters and channels</b>                              |                                                                                            |             |          |
| Slc22a29                                                      | solute carrier family 22. member 29                                                        | -2.57       | 2.20E-03 |
| Slco1a4                                                       | solute carrier organic anion transporter family, member 1a4                                | -2.56       | 2.26E-04 |
| Slc22a8                                                       | solute carrier family 22 (organic anion transporter), member 8                             | -1.99       | 1.74E-05 |
| Cacna2d3                                                      | calcium channel, voltage-dependent, alpha2/delta subunit 3                                 | -1.90       | 2.33E-04 |
| Aqp4                                                          | aquaporin 4                                                                                | -1.83       | 5.42E-05 |
| Abca8a                                                        | ATP-binding cassette, sub-family A (ABC1), member 8a                                       | -1.80       | 2.65E-04 |
| Atxn7l1                                                       | ataxin 7-like 1                                                                            | -1.55       | 1.47E-04 |
| Slc2a3*                                                       | solute carrier family 2 (facilitated glucose transporter), member 3                        | 1.54        | 2.13E-03 |
| Slc39a8                                                       | solute carrier family 39 (metal ion transporter), member 8                                 | 1.72        | 8.61E-04 |
| Slc7a1                                                        | solute carrier family 7 (cationic amino acid transporter, y <sup>+</sup> system), member 1 | 1.85        | 2.63E-06 |
| Slc16a3                                                       | solute carrier family 16 (monocarboxylic acid transporters), member 3                      | 2.11        | 1.10E-04 |
| Slc12a4                                                       | solute carrier family 12, member 4                                                         | 2.35        | 1.77E-04 |

**Table S2. Genes differentially regulated in the combination treatment as compared to the individual cellular treatments, in the P5/P17 model**

| Gene ID                                            | Description                                                               | Fold change | p value  |
|----------------------------------------------------|---------------------------------------------------------------------------|-------------|----------|
| <b>CD34<sup>+</sup>/ECFCs vs. CD34<sup>+</sup></b> |                                                                           |             |          |
| <b>Up-regulated</b>                                |                                                                           |             |          |
| <b>Neuronal structure and function</b>             |                                                                           |             |          |
| <b>Mbp*</b>                                        | myelin basic protein                                                      | 8.60        | 8.20E-03 |
| <b>Mobp*</b>                                       | myelin-associated oligodendrocytic basic protein                          | 7.05        | 2.36E-02 |
| Slc17a6                                            | solute carrier family 17 (Na-dependent inorganic phosphate cotransporter) | 6.56        | 3.61E-04 |
| <b>Cldn11*</b>                                     | claudin 11                                                                | 4.65        | 1.42E-02 |
| Tspan2                                             | tetraspanin 2                                                             | 4.09        | 1.94E-03 |
| Sncg                                               | synuclein, gamma                                                          | 3.53        | 2.95E-03 |
| <b>Olig1*</b>                                      | oligodendrocyte transcription factor 1                                    | 3.42        | 2.61E-02 |
| Apod                                               | apolipoprotein D                                                          | 3.27        | 3.13E-03 |
| Kcnd2                                              | potassium voltage-gated channel, Shal-related family, member 2            | 3.15        | 5.82E-04 |
| Gng4                                               | guanine nucleotide binding protein (G protein), gamma 4                   | 3.07        | 1.27E-03 |
| Chra6                                              | cholinergic receptor, nicotinic, alpha polypeptide 6                      | 2.88        | 5.49E-04 |
| Scn2a1                                             | sodium channel, voltage-gated, type II, alpha 1                           | 2.70        | 2.33E-03 |
| Tacr3                                              | tachykinin receptor 3                                                     | 2.68        | 1.13E-04 |
| Scn1a                                              | sodium channel, voltage-gated, type I, alpha                              | 2.67        | 5.32E-04 |
| Nefl                                               | neurofilament, light polypeptide                                          | 2.67        | 1.51E-03 |
| Cplx1                                              | complexin 1                                                               | 2.62        | 2.07E-03 |
| Cacng5                                             | calcium channel, voltage-dependent, gamma subunit 5                       | 2.62        | 1.90E-04 |
| Chrb3                                              | cholinergic receptor, nicotinic, beta polypeptide 3                       | 2.37        | 2.42E-03 |
| Cacnb4                                             | calcium channel, voltage-dependent, beta 4 subunit                        | 2.35        | 2.16E-04 |
| Gabra1                                             | gamma-aminobutyric acid (GABA) A receptor, subunit alpha 1                | 2.21        | 1.50E-05 |
| Caln1                                              | calneuron 1                                                               | 2.13        | 3.44E-04 |
| Syn2                                               | synapsin II                                                               | 2.02        | 3.30E-03 |
| <b>Visual system genes</b>                         |                                                                           |             |          |
| Vsn1                                               | visinin-like 1                                                            | 2.28        | 7.31E-04 |
| Vsx1                                               | visual system homeobox 1 homolog (zebrafish)                              | 2.17        | 5.92E-04 |
| Plcb1                                              | phospholipase C, beta 1                                                   | 1.94        | 2.10E-03 |
| Gucy1b3                                            | guanylate cyclase 1, soluble, beta 3                                      | 1.94        | 1.32E-04 |
| Cabp2                                              | calcium binding protein 2                                                 | 1.84        | 1.37E-04 |
| Gnao1                                              | guanine nucleotide binding protein, alpha O                               | 1.71        | 3.33E-06 |
| Prkcg                                              | protein kinase C, gamma                                                   | 1.71        | 3.18E-03 |
| Gucy1a3                                            | guanylate cyclase 1, soluble, alpha 3                                     | 1.69        | 1.81E-06 |
| Vsx2                                               | visual system homeobox 2                                                  | 1.68        | 2.35E-06 |
| Slc24a3                                            | solute carrier family 24 (sodium/potassium/calcium exchanger), member 3   | 1.64        | 7.87E-04 |
| Cabp5                                              | calcium binding protein 5                                                 | 1.61        | 3.91E-04 |
| Calm1                                              | calmodulin 1                                                              | 1.59        | 5.46E-06 |
| Gnai1                                              | guanine nucleotide binding protein (G protein), alpha inhibiting 1        | 1.51        | 2.64E-04 |
| <b>Down-regulated</b>                              |                                                                           |             |          |
| <b>Extracellular matrix, WNT pathway</b>           |                                                                           |             |          |
| Sfrp1                                              | secreted frizzled-related protein 1                                       | -10.49      | 1.52E-06 |
| Sdc1                                               | syndecan 1                                                                | -4.70       | 7.46E-07 |
| Wnt7b                                              | wingless-type MMTV integration site family, member 7B                     | -4.28       | 3.15E-03 |
| Plau                                               | plasminogen activator, urokinase                                          | -3.91       | 3.21E-03 |
| Col4a6                                             | collagen, type IV, alpha 6                                                | -3.79       | 1.86E-05 |
| Col4a3                                             | collagen, type IV, alpha 3                                                | -3.29       | 7.09E-05 |
| Col8a1                                             | collagen, type VIII, alpha 1                                              | -3.27       | 2.14E-03 |
| <b>Gene ID</b>                                     |                                                                           |             |          |
| <b>Description</b>                                 |                                                                           |             |          |
| <b>Fold change</b>                                 |                                                                           |             |          |
| <b>p value</b>                                     |                                                                           |             |          |
| Wls                                                | wntless homolog (Drosophila)                                              | -2.93       | 4.95E-06 |
| Nid1                                               | nidogen 1                                                                 | -2.57       | 3.38E-03 |
| Col4a5                                             | collagen, type IV, alpha 5                                                | -2.50       | 3.69E-04 |
| Loxl1                                              | lysyl oxidase-like 1                                                      | -2.50       | 2.15E-04 |
| Wnt5b                                              | wingless-type MMTV integration site family, member 5B                     | -2.47       | 5.89E-07 |
| Col4a4                                             | collagen, type IV, alpha 4                                                | -2.44       | 7.47E-06 |
| Bgn                                                | biglycan                                                                  | -2.43       | 3.03E-04 |
| <b>Emid1**</b>                                     | EMI domain containing 1                                                   | -2.10       | 1.60E-05 |
| Timp3                                              | tissue inhibitor of metalloproteinase 3                                   | -2.01       | 1.55E-04 |
| Col4a1                                             | collagen, type IV, alpha 1                                                | -1.94       | 1.32E-03 |
| Fmod                                               | fibromodulin                                                              | -1.88       | 2.39E-03 |
| P4ha2                                              | proline 4-hydroxylase, alpha II polypeptide                               | -1.72       | 7.04E-04 |
| P4ha1                                              | proline 4-hydroxylase, alpha 1 polypeptide                                | -1.69       | 3.83E-05 |
| Lama5                                              | laminin, alpha 5                                                          | -1.57       | 3.25E-03 |
| <b>Stress response</b>                             |                                                                           |             |          |
| Nupr1                                              | nuclear protein transcription regulator 1                                 | -9.48       | 1.91E-04 |
| Gsta2                                              | glutathione S-transferase, alpha 2 (Yc2)                                  | -3.30       | 1.02E-04 |
| Pon3                                               | paraoxonase 3                                                             | -3.06       | 1.48E-04 |
| Gsta3                                              | glutathione S-transferase, alpha 3                                        | -2.55       | 7.00E-05 |
| Gpx3                                               | glutathione peroxidase 3                                                  | -2.52       | 3.27E-03 |
| Gss                                                | glutathione synthetase                                                    | -2.50       | 8.49E-04 |
| Ggct                                               | gamma-glutamyl cyclotransferase                                           | -2.47       | 9.07E-04 |
| Gstm2                                              | glutathione S-transferase, mu 2                                           | -2.46       | 6.67E-04 |
| Mgst1                                              | microsomal glutathione S-transferase 1                                    | -2.45       | 1.61E-03 |
| Gstm1                                              | glutathione S-transferase, mu 1                                           | -2.44       | 1.85E-05 |
| Rrm2                                               | ribonucleotide reductase M2                                               | -2.26       | 1.61E-03 |
| Prdx4                                              | peroxiredoxin 4                                                           | -1.61       | 3.81E-03 |
| Pon2                                               | paraoxonase 2                                                             | -1.57       | 1.87E-04 |
| <b>CD34<sup>+</sup>/ECFCs vs. ECFCs</b>            |                                                                           |             |          |
| <b>Up-regulated</b>                                |                                                                           |             |          |
| <b>Myelin structure and function</b>               |                                                                           |             |          |
| <b>Mbp*</b>                                        | myelin basic protein                                                      | 9.87        | 5.37E-03 |
| <b>Mobp*</b>                                       | myelin-associated oligodendrocytic basic protein                          | 6.86        | 2.53E-02 |
| Plp1                                               | proteolipid protein (myelin) 1                                            | 5.42        | 9.65E-03 |
| <b>Olig1*</b>                                      | oligodendrocyte transcription factor 1                                    | 3.57        | 2.18E-02 |
| Mal                                                | myelin and lymphocyte protein, T cell differentiation protein             | 2.99        | 3.60E-02 |
| Slc15a2                                            | solute carrier family 15 (H <sup>+</sup> /peptide transporter), member 2  | 2.47        | 3.94E-02 |
| <b>Cldn11*</b>                                     | claudin 11                                                                | 3.80        | 3.02E-02 |
| Scd1                                               | stearoyl-Coenzyme A desaturase 1                                          | 2.10        | 7.60E-03 |
| <b>Down-regulated</b>                              |                                                                           |             |          |
| <b>Immune response</b>                             |                                                                           |             |          |
| Tgtp1                                              | T cell specific GTPase 1                                                  | -3.51       | 1.26E-02 |
| H2-Q6                                              | histocompatibility 2, Q region locus 6                                    | -2.77       | 2.12E-02 |
| Ccl5                                               | chemokine (C-C motif) ligand 5                                            | -2.62       | 3.62E-02 |
| H2-Q7                                              | histocompatibility 2, Q region locus 7                                    | -2.50       | 1.05E-02 |
| H2-K1                                              | histocompatibility 2, K1, K region                                        | -2.14       | 3.64E-02 |
| H2-T10                                             | histocompatibility 2, T region locus 10                                   | -1.74       | 1.57E-02 |
| H2-D1                                              | histocompatibility 2, D region locus 1                                    | -1.71       | 1.79E-02 |
| <b>Neovascularization</b>                          |                                                                           |             |          |
| Crispld1                                           | cysteine-rich secretory protein LCCL domain containing 1                  | -1.78       | 3.29E-03 |
| Ptger4                                             | prostaglandin E receptor 4 (subtype EP4)                                  | -1.68       | 1.05E-02 |
| <b>ECM</b>                                         |                                                                           |             |          |
| <b>Emid1**</b>                                     | EMI domain containing 1                                                   | -1.61       | 1.64E-03 |

**Table S3. Proteomic analysis in the OIR model with the various treatments**

| Pathway                                                  | Score | Proteins                                                                                        |
|----------------------------------------------------------|-------|-------------------------------------------------------------------------------------------------|
| <b>OIR vs. Normoxia</b>                                  |       |                                                                                                 |
| <b>Up-regulated</b>                                      |       |                                                                                                 |
| <b>Growth factors signaling pathways</b>                 |       |                                                                                                 |
| Development HGF Signaling Pathway                        | 51.42 | ABL1, NFKB1, MAP2K1, MAPK3, PTPN11, STAT3, RAF1, BRAF, EIF4E, ERBB2, RPS6KA1, CDK1              |
| Development IGF-1 Receptor Signaling                     | 46.34 | NFKB1, MAP2K1, MAPK3, GYS1, PTPN11, BCL2L11, STAT3, RAF1, RPS6, RPS6KA1                         |
| PI3K-Akt Signaling Pathway                               | 40.84 | NFKB1, MAP2K1, MAPK3, MCL1, GYS1, BCL2L11, RAF1, EIF4E, PDGFRA, ERBB2, RPS6, FN1, KDR           |
| Development VEGF Signaling Via VEGFR2 - Generic Cascades | 33.52 | NFKB1, MAP2K1, MAPK3, PTPN11, STAT3, RAF1, BRAF, KDR                                            |
| Development EGFR Signaling Via Small GTPases             | 33.42 | MAP2K1, MAPK3, PTPN11, STAT3, RAF1, PDGFRA, ERBB2                                               |
| EGF/EGFR Signaling Pathway                               | 32.29 | ABL1, MAP2K1, PTPN11, STAT3, RAF1, BRAF, ERBB2, RPS6KA1                                         |
| Angiopoietin Like Protein 8 Regulatory Pathway           | 25.28 | MAP2K1, MAPK3, GYS1, PTPN11, RAF1, EIF4E, RPS6KA1                                               |
| <b>Inflammation and immune response</b>                  |       |                                                                                                 |
| Interleukin-11 Signaling Pathway                         | 40.12 | MAP2K1, MAPK3, PTPN11, STAT3, RAF1, RPS6, RPS6KA1                                               |
| Cytokine Signaling in Immune System                      | 37.96 | NFKB1, LCK, MAP2K1, MAPK3, MCL1, PTPN11, HIST1H3A, STAT3, RAF1, BRAF, EIF4E, PDGFRA, ERBB2, FN1 |
| HIF-1 Signaling Pathway                                  | 37.90 | NFKB1, MAP2K1, MAPK3, STAT3, HK2, EIF4E, ERBB2, RPS6                                            |
| TGF-Beta Pathway                                         | 36.49 | NFKB1, MAP2K1, MAPK3, HIST1H3A, STAT3, RAF1, BRAF, EIF4E, PDGFRA, ERBB2, RPS6, RPS6KA1, KDR     |
| B Cell Receptor Signaling Pathway (KEGG)                 | 33.92 | NFKB1, LCK, MAP2K1, MAPK3, PTPN11, RAF1, BRAF, RPS6KA1                                          |
| IL-2 Pathway                                             | 33.76 | ABL1, NFKB1, LCK, MAP2K1, MAPK3, STAT3, RAF1, BRAF, ERBB2, RPS6KA1                              |
| Immune Response IL-23 Signaling Pathway                  | 32.50 | NFKB1, MAPK3, YAP1, PTPN11, STAT3, PDGFRA, ERBB2, FN1                                           |
| IL6-mediated Signaling Events                            | 24.00 | MAP2K1, MAPK3, MCL1, PTPN11, STAT3                                                              |
| <b>Cell-Matrix interaction</b>                           |       |                                                                                                 |
| Focal Adhesion                                           | 30.87 | MAP2K1, MAPK3, STAT3, RAF1, BRAF, PDGFRA, ERBB2, FN1, KDR                                       |
| <b>Down-regulated</b>                                    |       |                                                                                                 |
| ErbB Signaling Pathway                                   | 25.36 | MAPK9, PRKCA, STAT5A, PAK4, PDK1, CCND1                                                         |
| Autophagy - Animal                                       | 20.79 | MAPK9, ATG3, PTEN, BCL2L1, BECN1                                                                |
| <b>CD34<sup>+</sup>/ECFCs vs. CD34<sup>+</sup></b>       |       |                                                                                                 |
| <b>Up-regulated</b>                                      |       |                                                                                                 |
| ErbB Signaling Pathway                                   | 21.00 | MDM2, STAT5A, RAF1, PAK4                                                                        |
| Autophagy                                                | 15.93 | MDM2, BECN1, RAF1, IRS1                                                                         |
| <b>Down-regulated</b>                                    |       |                                                                                                 |
| Class I MHC Mediated Antigen Processing and Presentation | 9.74  | UBAC1, ZAP70, CDH1                                                                              |
| Cytoskeletal Signaling                                   | 8.27  | STMN1, CDH1, MYH11                                                                              |
| <b>CD34<sup>+</sup>/ECFCs vs. ECFC</b>                   |       |                                                                                                 |
| <b>Up-regulated</b>                                      |       |                                                                                                 |
| Nanog in Mammalian ESC Pluripotency                      | 15.11 | PLCG2, POU5F1, PRKAA2, SOX2, RAF1                                                               |
| Retinoblastoma (RB) in Cancer                            | 14.83 | RAF1, MSH6, CHEK1                                                                               |
| <b>Down-regulated</b>                                    |       |                                                                                                 |
| ERK Signaling                                            | 14.25 | COL6A1, SMAD3, ZAP70, CDK1                                                                      |
